# Supplementary material
Source: Research Square preprint supplement (doi:10.21203/rs.3.rs-8740580/v1)
Supplement: Supplementary file 1 [file dff939f6f67cb6b03e6d5548.docx]

# **Medix Frontiers Research Fellowship Questionnaire**

**Purpose:** Programme evaluation and research

Participation in this questionnaire is voluntary. Responses will be used for programme evaluation and research purposes only. All data will be anonymized and reported in aggregate form.

**Important:** Do **NOT** use ChatGPT or any other AI/LLM tools to answer this survey. It is acceptable to respond "unsure" where applicable.

For inquiries, please contact:

- **Godswill Uzoechina** – Director, Research and Publications Directorate (RPD)
- Phone: 09039660878

**Note:** This fellowship is organized by the Research and Publications Directorate (RPD), Medix Frontiers.

## **Consent**

☐ I consent to participate in this survey and agree to the use of my anonymized data for research and publication purposes.

## **Section A: Demographic and Background Information**

1. Are you a member of Medix Frontiers?
   - ☐ Yes
   - ☐ No
2. Age (years): ____ (please enter a number only; e.g., 20)
3. Sex:
   - ☐ Male
   - ☐ Female
   - ☐ Prefer not to say
4. Faculty: ____________________
5. Level of study: ____________________
6. Have you previously participated in a research project?
   - ☐ Yes
   - ☐ No
7. Have you previously participated in a research fellowship or relevant training?
   - ☐ Yes
   - ☐ No
8. Have you authored or co-authored a research manuscript?
   - ☐ Yes
   - ☐ No

## **Section B: Self‑Assessed Research Competence**

**Likert scale:**1 = No experience | 2 = Basic awareness | 3 = Can perform with guidance | 4 = Can perform independently | 5 = Can teach others

Please indicate your level of competence in the following activities:

1. Formulating a research question (1–5): ____
2. Literature search (e.g., PubMed, Google Scholar) (1–5): ____
3. Research study design selection (1–5): ____
4. Data collection tools (questionnaires, forms) (1–5): ____
5. Data analysis (e.g., Excel, SPSS, R, Python) (1–5): ____
6. Scientific writing (IMRAD structure) (1–5): ____
7. Interpreting research results (1–5): ____
8. Research ethics and informed consent (1–5): ____

## **Section C: Motivation for Joining the Fellowship**

**Scale:** 1 = Not important | 5 = Very important

How important are the following reasons for joining the Research Fellowship?

1. Improving research skills (1–5): ____
2. Publishing academic papers (1–5): ____
3. Receiving mentorship (1–5): ____
4. Career advancement (1–5): ____
5. Networking with peers (1–5): ____

## **Section D: Fellowship Commitment and Logistics**

1. Which **one** research area best aligns with your long‑term career interests?

- Clinical research
- Public health
- Medical education
- Health policy
- Data science/analytics

1. How many hours per week can you realistically dedicate to fellowship activities?

- ☐ <2 hours
- ☐ 2–4 hours
- ☐ 5–7 hours
- ☐ >7 hours

1. Are you willing to actively participate in research meetings, trainings, and project tasks?

- ☐ Yes
- ☐ No

1. Do you have reliable internet access for virtual activities?

- ☐ Yes
- ☐ No

## **Section E: Declarations**

Please indicate your level of agreement with the following statements:

1. I understand that a certificate will be awarded only to fellows who attain at least 75% attendance across fellowship activities. ☐ Yes ☐ No
2. I understand that fellows who fail to participate actively may be withdrawn from the fellowship. ☐ Yes ☐ No
3. I commit to professional conduct and the timely completion of assigned tasks. ☐ Yes ☐ No
4. I confirm that the information provided is accurate and that I am willing to comply with the fellowship requirements. ☐ Yes ☐ No

**End of Questionnaire**
